# Supplementary material for: Social contact patterns and implications for infectious disease transmission – a systematic review and meta-analysis of contact surveys
Source: eLife. 2021 Nov 25;10:e70294. doi: 10.7554/eLife.70294 (PMC8765757; doi:10.7554/eLife.70294)
Supplement: Supplementary file 3. [file elife-70294-supp3.xlsx]

## Sheet: AXIS tool
	LIC	LMIC						UMIC													HIC
	Le Polain de Waroux 2018	Kumar 2018	Kiti 2014	Potter 2019	Horby 2011	Dodd 2016	Melegaro 2017	Read 2014	Zhang 2019	Huang 2020	Watson 2017	Neal 2020	Grijalva 2015	Ajelli 2017	Dodd 2016	Wood 2012	Mahikul 2020	Stein 2014	Meeyai 2015	Oguz 2018	Mossong 2008	Kwok 2014	Kwok 2018	Leung 2017
1. Were the aims/ objectives of the study clear?	1	1	1	1	1	1	1	1	1	1	1	1	1	1	1	1	1	1	1	1	1	1	1	1
2. Was the study design appropriate for the stated aims?	1	1	1	1	1	1	1	1	1	1	1	1	1	1	1	1	1	1	1	1	1	1	1	1
3. Was the sample size justified? (e.g sample size calculation)	1	1	1	0	0	0	1	0	0	0	0	1	0	0	0	0	0	0	0	0	0	0	0	0
4. Was the target/ reference population clearly defined? (e.g. sufficient information on the setting)	1	1	1	1	1	1	1	1	1	1	1	1	1	1	1	1	1	1	0	1	0	0	1	0
5. Was the sample frame taken from an appropriate population base so that it closely represented the target/reference population relevant to our review? (general population)	1	0	1	0	1	0	1	1	1	1	1	0	1	0	0	1	0	0	1	0	1	1	1	1
6. Was the selection process likely to select subjects/ participants that were representative of the target/ reference population ? (random sampling)	1	0	1	0	1	1	1	1	0	1	1	1	0	0	1	1	0	0	0	1	1	1	1	1
7. Were demographic variables collected appropriate to the aims of the study? (participant's age and gender)	1	1	1	1	1	1	1	1	1	1	1	1	1	0	1	1	1	1	1	1	1	1	1	1
8. Was information on potential confounders collected (e.g. household size/ employment or student status)	1	1	1	1	1	1	1	0	1	1	0	1	1	1	1	1	1	1	0	1	1	1	1	1
9. Were the risk factor and outcome variables measured correctly using appropriate survey methodology?	1	1	1	1	1	1	1	1	1	1	1	1	1	1	1	1	1	0	1	1	1	1	1	1
10. Was the final sample size large? (>500 participants)	1	1	1	1	1	1	1	1	1	1	1	1	1	1	1	1	0	0	1	1	1	1	1	1
11. Were basic demographic data adequately described?	1	1	1	1	1	1	1	1	1	1	1	1	1	1	1	1	1	1	1	1	1	1	1	1
12.Does the study state a response rate of >70%?	1	1	0	0	0	0	0	0	0	0	1	0	0	0	0	1	1	0	0	1	0	0	0	0
13. Were the results for the analyses described in the methods presented?	1	1	1	1	1	1	1	1	1	1	1	1	1	1	1	1	1	1	1	1	1	1	1	1
14. Were the authors’ discussions and conclusions justified by the results?	1	1	1	1	1	1	1	1	1	1	1	1	1	1	1	1	1	1	1	1	1	1	1	1
15. Were the limitations of the study discussed?	1	1	1	1	1	1	1	1	1	1	1	1	1	1	1	1	1	1	1	1	1	1	1	1
16. Were there any funding sources or conflicts of interest that may affect the authors’ interpretation of the results?	1	1	1	1	1	1	1	1	1	1	1	1	1	1	1	1	1	1	1	1	1	1	1	1
17.Was ethical approval or consent of participants attained?	1	1	1	1	0	1	1	1	1	1	1	1	1	1	1	1	1	1	0	1	1	1	1	1
Quality score (%)	100	88.2353	94.1176	76.4706	82.3529	82.3529	94.1176	82.3529	82.3529	88.2353	88.2353	88.2353	82.3529	70.5882	82.3529	94.1176	76.4706	64.7059	64.7059	88.2353	82.3529	82.3529	88.2353	82.3529
